# Supplementary material for: Optimized ultrafast flow synthesis of CON-type zeolite and improvement of its catalytic properties
Source: Royal Society of Chemistry journal article supplement (doi:10.1039/d0re00309c), 2020-01-01
Supplement: d0re00309c1.pdf [file d0re00309c1.pdf]

## Electronic Supplementary Information

### Optimized Ultrafast Flow Synthesis of CON-type Zeolite and Improvement of Its Catalytic Properties

Anand Chokkalingam,<sup>a#</sup> Kenta Iyoki,<sup>a#</sup> Naoki Hoshikawa,<sup>a</sup> Hiroaki Onozuka,<sup>b</sup> Watcharop Chaikittisilp,<sup>a†</sup> Susumu Tsutsuminai,<sup>b</sup> Takahiko Takewaki,<sup>b</sup> Toru Wakihara,<sup>\*a,c</sup> and Tatsuya Okubo<sup>\*a</sup>

---

<sup>a</sup>. Department of Chemical System Engineering, The University of Tokyo, 7-3-1 Hongo, Bunkyo-ku, Tokyo 113-8656, Japan.

<sup>b</sup>. Inorganic Materials Laboratory, Science & Innovation Center, Mitsubishi Chemical Corporation, Kamoshida-cho, Aoba-ku, Yokohama 227-8502, Japan.

<sup>c</sup>. Institute of Engineering Innovation, The University of Tokyo, 2-11-16 Yayoi, Bunkyo-ku, Tokyo 113-8656, Japan

---

<sup>\*</sup>Corresponding author Email: wakihara@chemsys.t.u-tokyo.ac.jp, okubo@chemsys.t.u-tokyo.ac.jp Fax: +81-3-5800-3806.

<sup>#</sup>These authors contribute equally. <sup>†</sup>Present address: Research and Services Division of Materials Data and Integrated System, National Institute for Materials Science, 1-1 Namiki, Tsukuba, Ibaraki 305-0044, Japan.

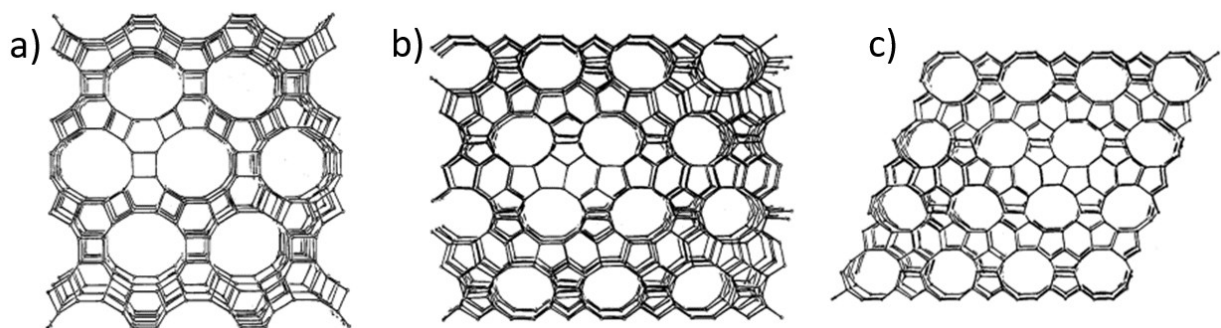

**Figure S1.** Framework structure of CON, polymorph A viewed along a) 12-ring pores and b) 10-ring pores and c) polymorph B viewed along the 10-ring pores

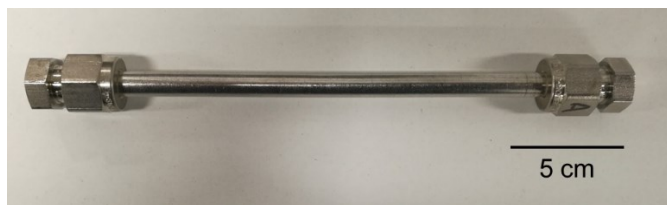

**Figure S2.** Tubular reactor

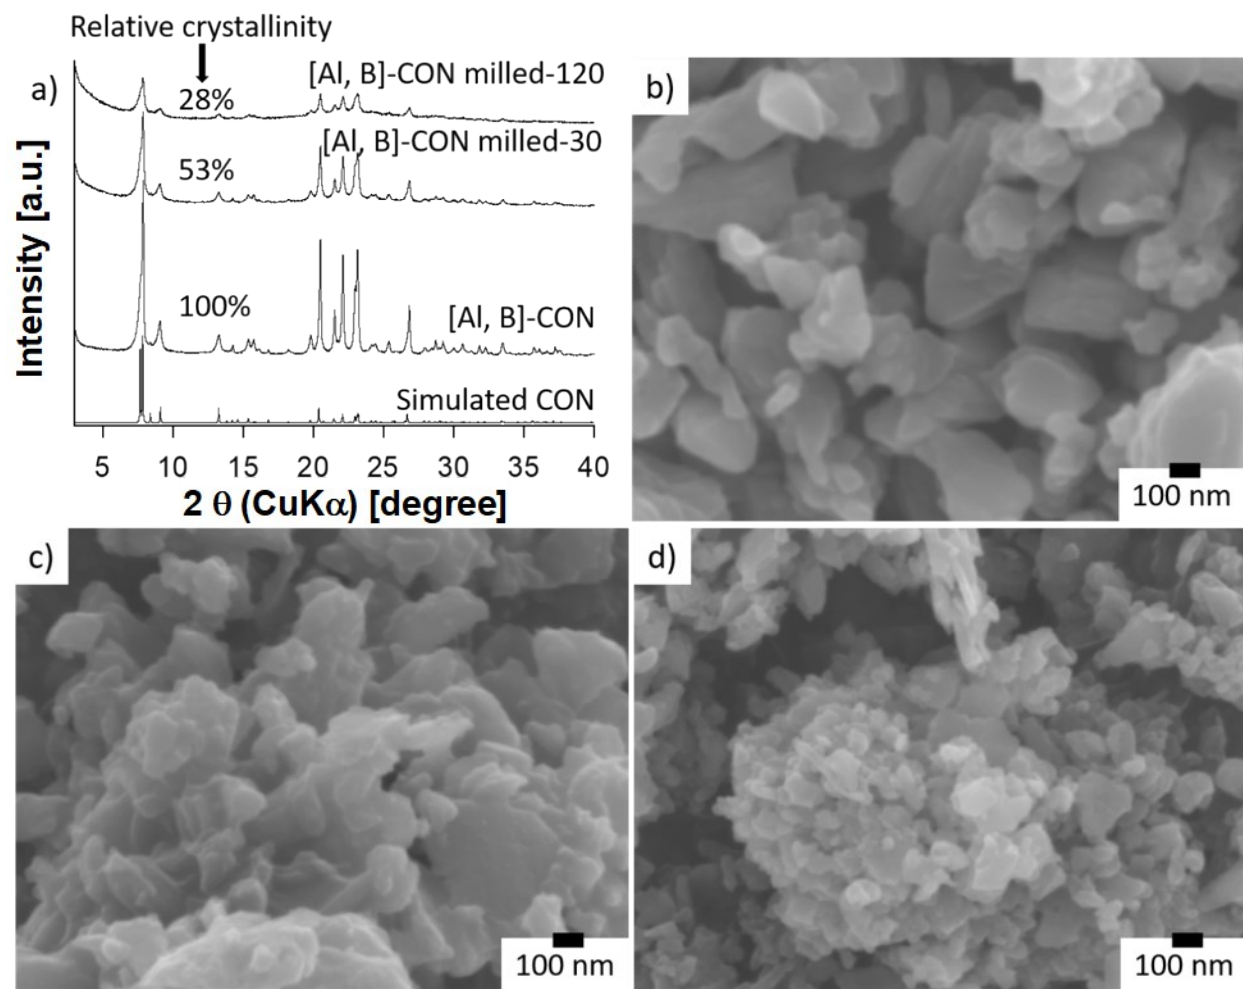

**Figure S3.** a) XRD patterns and relative crystallinities of [Al, B]-CON, [Al, B]-CONmilled-30 and [Al, B]-CONmilled-120; SEM images of b) [Al, B]-CON, c) [Al, B]-CONmilled-30 and d) [Al, B]-CONmilled-120

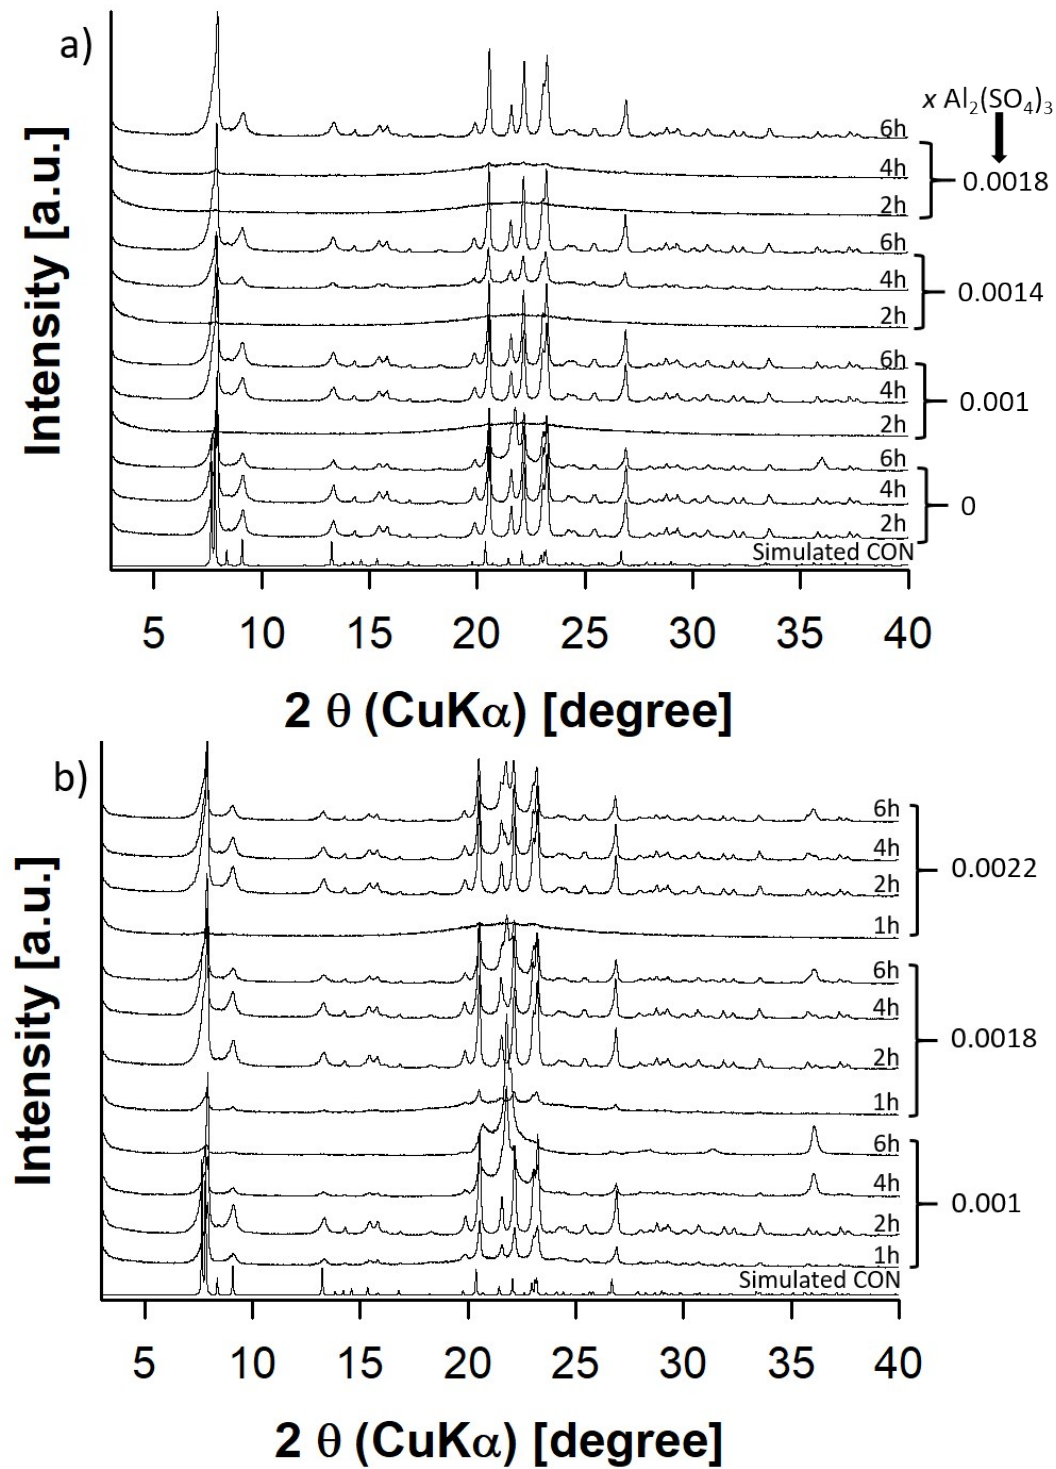

Figure S4. Crystallization curves for different synthesis temperatures; a) 200 and b) 220 °C.

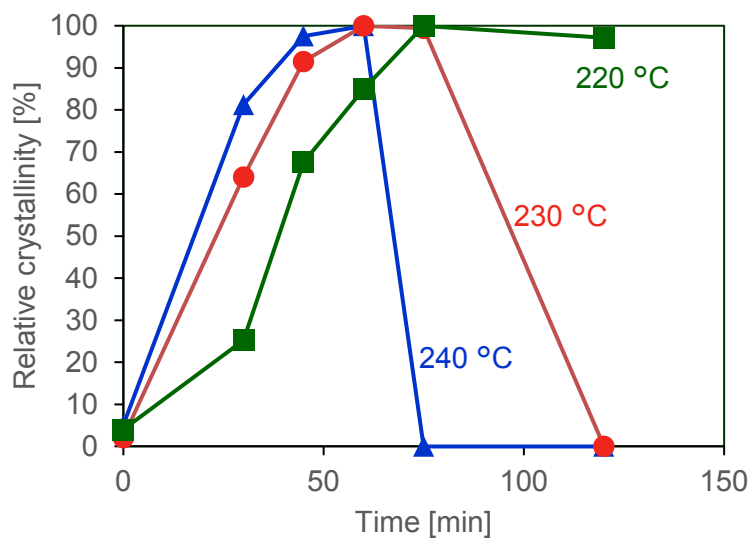

**Figure S5.** Crystallization curves for different synthesis temperatures. The Figure shows the relative crystallinity of the CON phases as the crystallinity of the overall sample (including cristobalite phase).

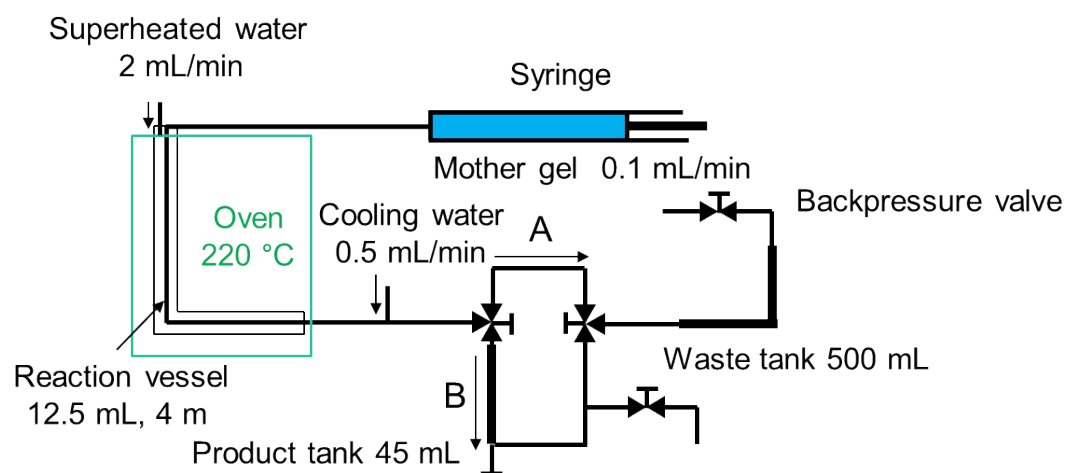

**Figure S6.** Schematic representation of the continuous flow synthesis

(a) Standard

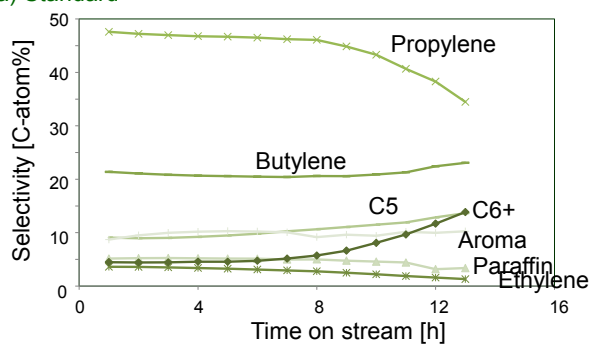

(b) Fast-synthesized (220 °C)

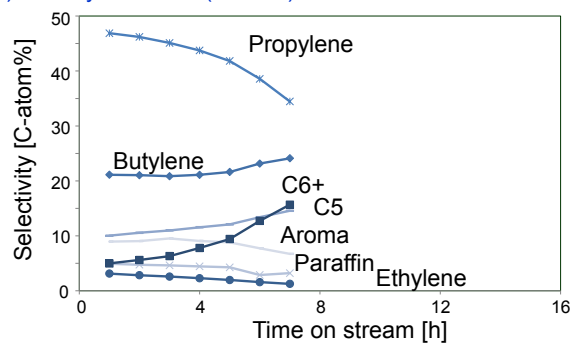

(c) Fast-synthesized (240 °C)

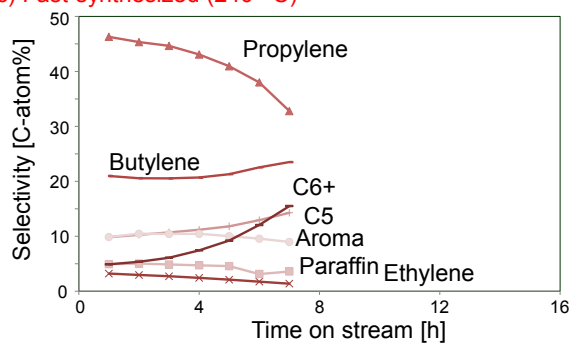

(d) Alkaline treated, fast-synthesized

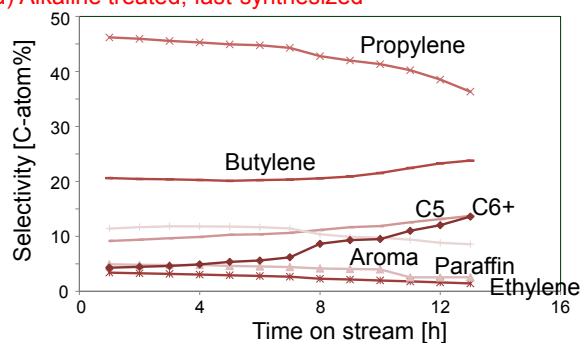

**Figure S7.** Selectivity on MTO reactions; (a) standard, (b) fast-synthesized (220 °C), (c) fast-synthesized (240 °C), and (d) Alkaline treated, fast-synthesized CON
